# Supplementary material
Source: publisher figshare collection journal article supplement (https://gsajournals.figshare.com/ndownloader/files/13507316)
Supplement: Supplementary file 1 [file 13507316]

Figure S1

NCU03116 *N. crassa*

MGG 03700 *M. oryzae*

AN9463 *A. nidulans*

rng2 SPAC4F8.13c *S. pombe*

IQG1 *S. cerevisiae*

IQG1 orf19.6536 *C. albicans*

AN3735 *A. nidulans*

NCU03852 *N. crassa*

MGG 08105 *M. oryzae*

BUD2 *S. cerevisiae*

BUD2 orf19.940 *C. albicans*

IRA2 *S. cerevisiae*

IRA1 *S. cerevisiae*

IRA2 orf19.5219 *C. albicans*

NCU01642 *N. crassa*

MGG 11425 *M. oryzae*

NCU06122 *N. crassa*

MGG 03846 *M. oryzae*

gapA AN4998 *A. nidulans*

gap1 SPBC646.12c *S. pombe*

93

99

99

99

99

99

100

99

88

99

100

94

60

100

99

97

96

0.2
